# Supplementary material for: Gene Expression Predicts Histological Severity and Reveals Distinct Molecular Profiles of Nonalcoholic Fatty Liver Disease
Source: PubMed Central journal article supplement (PMC6715650; doi:10.1038/s41598-019-48746-5), 2019-08-29
Supplement: 41598_2019_48746_MOESM1_ESM.pdf [file 41598_2019_48746_MOESM1_ESM.pdf]

## GENE EXPRESSION PREDICTS HISTOLOGICAL SEVERITY AND REVEALS DISTINCT MOLECULAR PROFILES OF NONALCOHOLIC FATTY LIVER DISEASE

Stephen A. Hoang PhD<sup>1</sup>, Abdul Oseini MD<sup>2</sup>, Ryan E. Feaver PhD<sup>1</sup>, Banumathi Cole PhD<sup>1</sup>, Amon Asgharpour MD<sup>3</sup>, Robert Vincent MD PhD<sup>2</sup>, Mohammad Siddiqui MD<sup>2</sup>, Mark J. Lawson PhD<sup>1</sup>, Nathan C. Day<sup>1</sup>, Justin M. Taylor<sup>1</sup>, Brian R. Wamhoff PhD<sup>1</sup>, Faridoddin Mirshahi MS<sup>2</sup>, Melissa J Contos MD<sup>2</sup>, Michael Idowu MD<sup>2</sup> and Arun J. Sanyal MBBS MD<sup>2</sup>

**Corresponding authors:**

**Stephen A. Hoang PhD**  
Title: Head of Computational Biology, HemoShear Therapeutics  
Address: 501 Locust Avenue  
Charlottesville, VA 22902  
Phone: (434) 872 0196  
Fax:  
Email: [hoang@hemoshear.com](mailto:hoang@hemoshear.com)

**Senior author:**

**Arun J. Sanyal**  
Title: Z. Reno Vlahcevic Professor of Medicine, Physiology and Molecular Pathology  
Address: MCV Box 980341  
Richmond, VA 23298-0341  
Phone: (804) 828 6314  
Fax: (804) 828 2992  
Email: [arun.sanyal@vcuhealth.org](mailto:arun.sanyal@vcuhealth.org)

**Affiliations:**

1. HemoShear Therapeutics, LLC, Charlottesville, Virginia
2. Div. of Gastroenterology, Hepatology and Nutrition, Dept. of Internal Medicine, Virginia Commonwealth University School of Medicine, Richmond, VA
3. Div. of Surgical Pathology, Dept. of Pathology, Virginia Commonwealth University School of Medicine, Richmond, VA

**Supplementary figure 1**

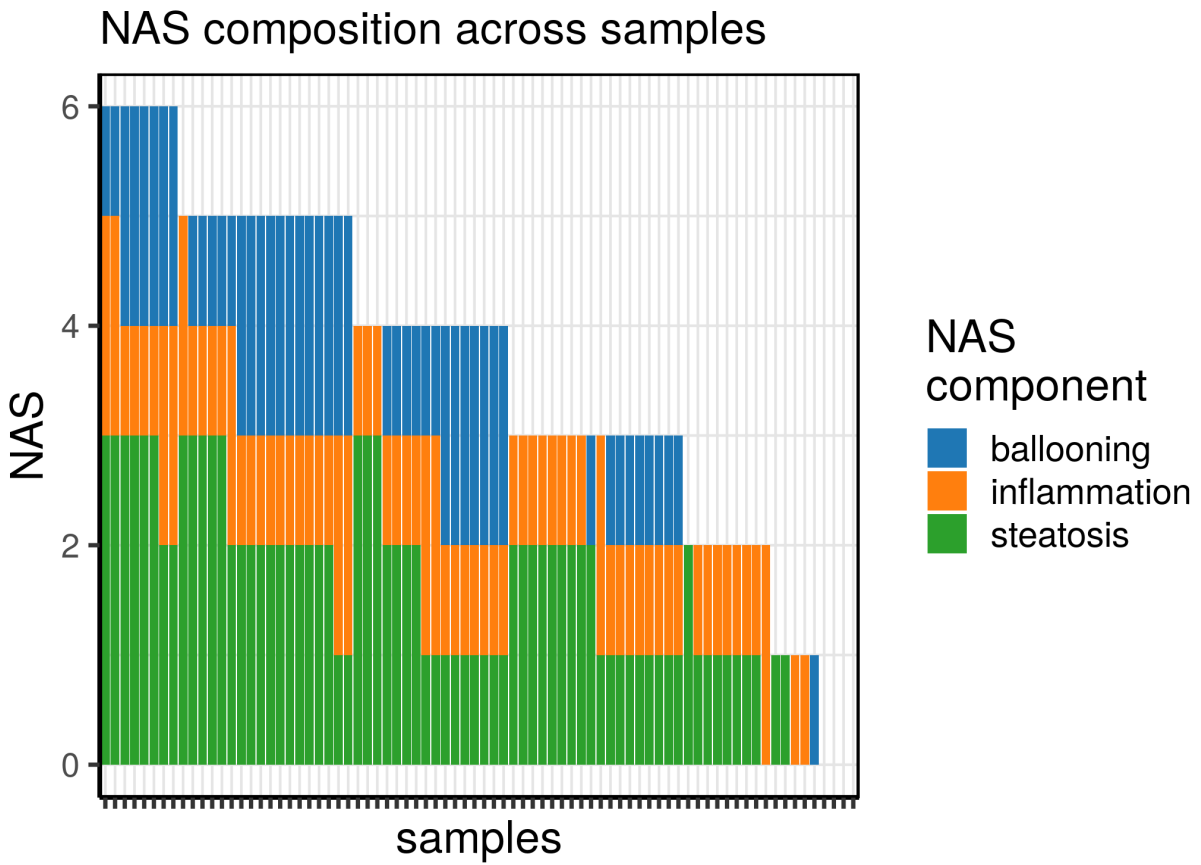

**Supplementary figure 2**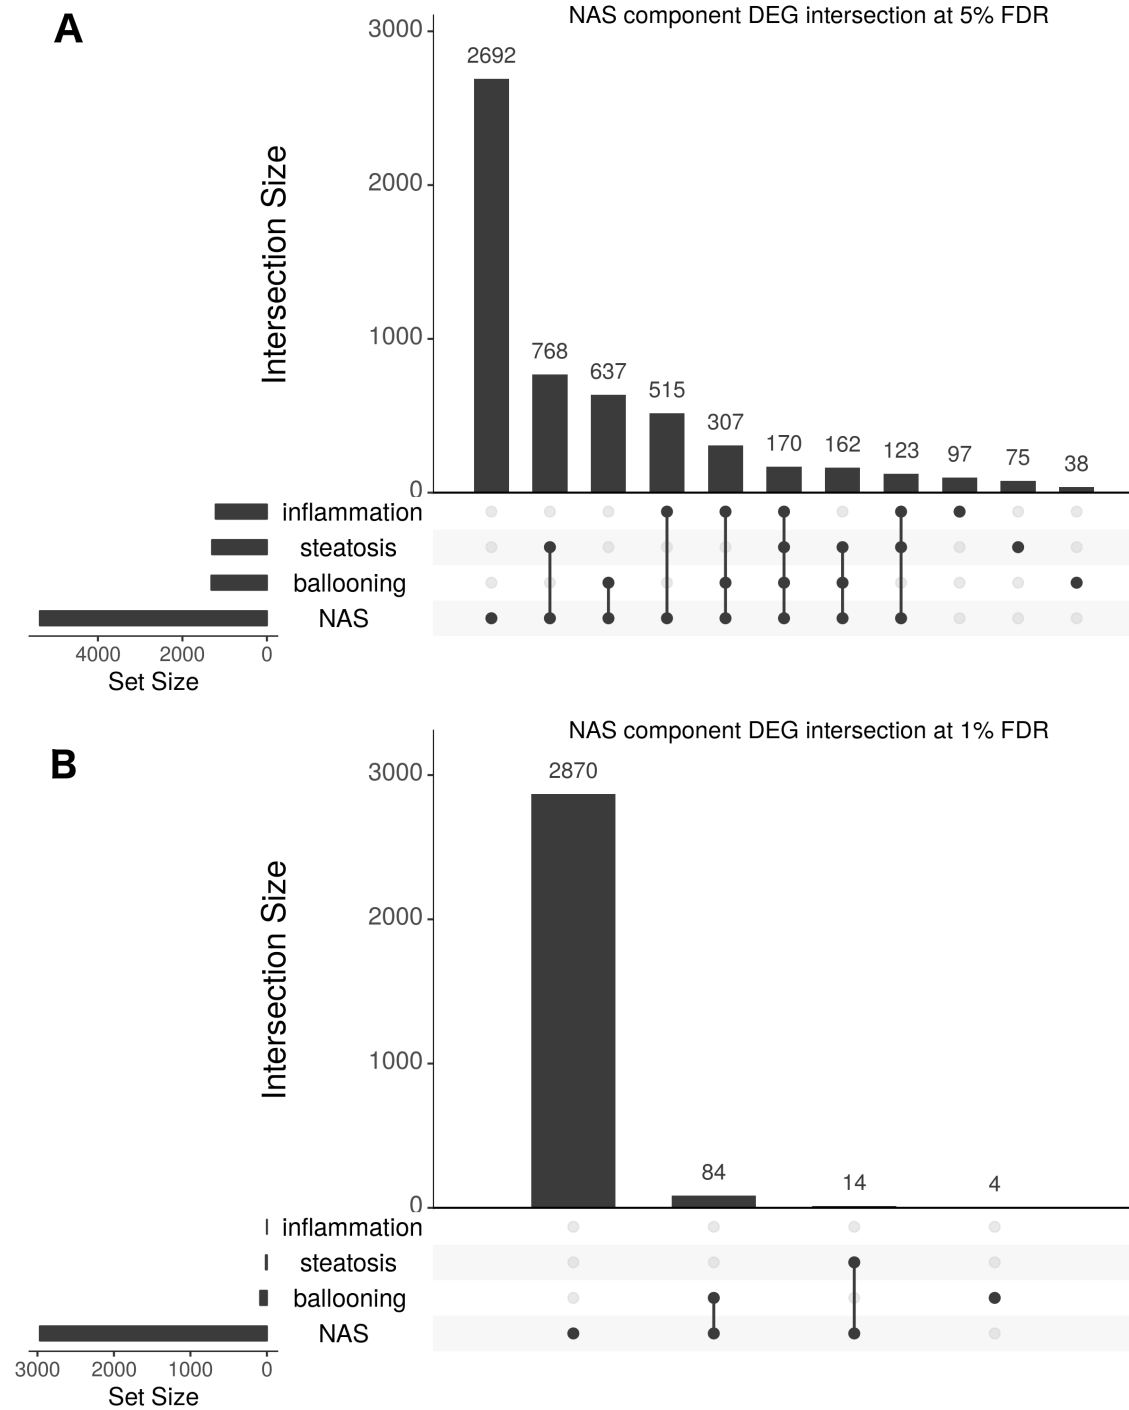

**Supplementary Figure 2:** Differential expression analysis of NAS components. Plot shows the set intersection cardinality for differentially expressed genes at 5% (A) and 1% (B) FDR thresholds. Differentially expressed genes were assessed with respect to lobular inflammation, steatosis, cytological ballooning, and the composite NAS. Individual set sizes are shown on the

lower left corner of the plots, intersection sizes are on the y-axis, and intersection labels are shown along the x-axis.

### Supplementary figure 3

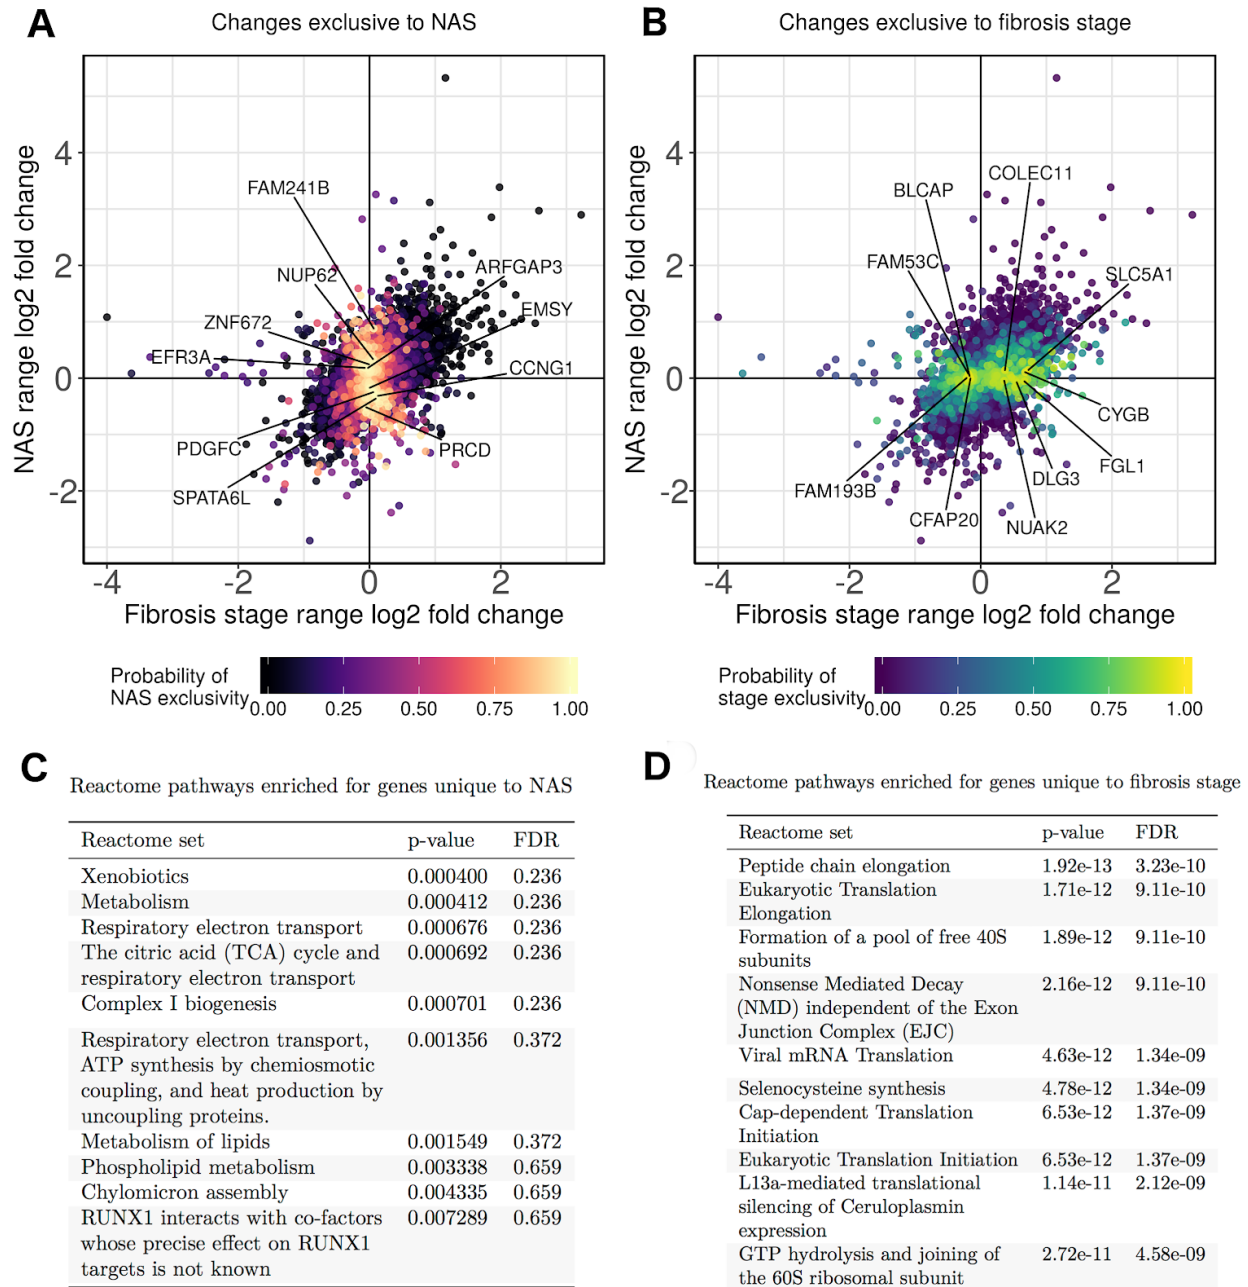

**Supplementary Figure 3:** An analysis of gene expression responses that are unique to NAS (A) or fibrosis stage (B). Figures A & B are fold change-fold change plots (NAS vs fibrosis stage), where each point represents a gene, and color represents the posterior probability that a given gene is uniquely differentially regulated with respect to NAS (A) or fibrosis stage (B) (i.e. the

probability approaches one when a gene shows strong evidence of differential regulation in one condition, but not the other). The top 10 genes are labeled in plots A & B. The tables (C & D) show the Reactome gene sets that are enriched for genes with a high degree of uniqueness.

### Supplementary Figure 4

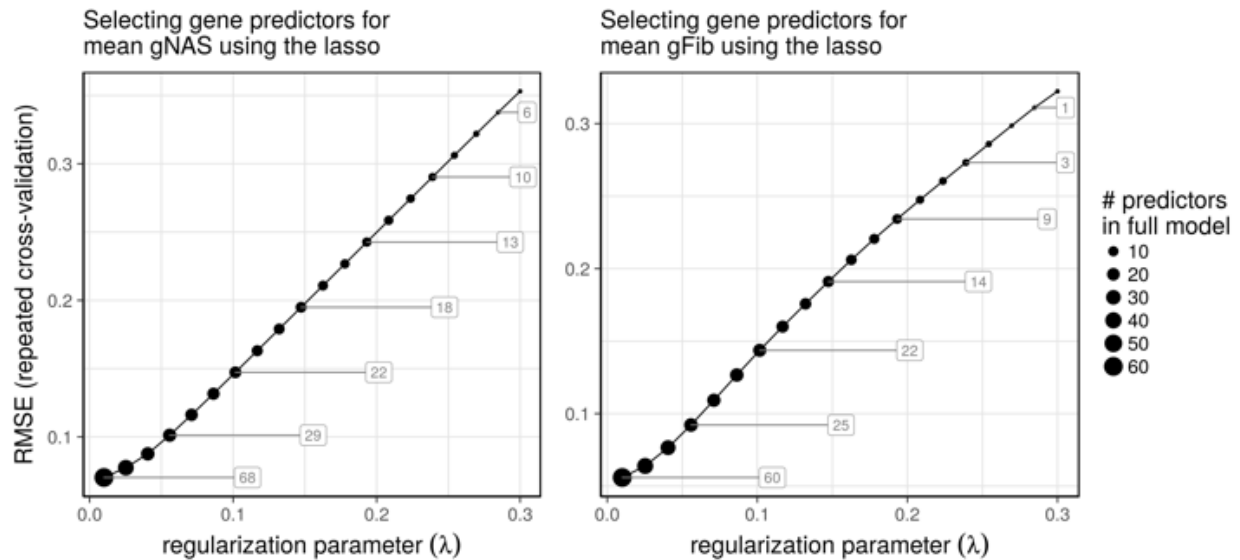

**Supplementary Figure 4:** The cross-validation root-mean-squared error of the lasso models as a function of the regularization parameter. The number of predictors in each model is represented as point size.

**Supplemental Table 1: Characteristics of the populations studied**

|                                                      | Histologically normal control<br>N=6 | NAFLD<br>N=72  |
|------------------------------------------------------|--------------------------------------|----------------|
| Age (yrs) mean $\pm$ S.D.                            | 49.8 $\pm$ 21                        | 52.8 $\pm$ 12  |
| Gender (males) n                                     | 2                                    | 28             |
| Caucasians (n)                                       | 5                                    | 64             |
| Body Mass Index (kg/m <sup>2</sup> ) mean $\pm$ S.D. | 25.9 $\pm$ 5.8                       | 33.3 $\pm$ 5.5 |
| Diabetes (n)                                         | 0                                    | 29             |
| Hypertension (n)                                     | 1                                    | 46             |
| Hyperlipidemia (n)                                   | 0                                    | 42             |
| AST (IU/L) mean $\pm$ S.D.                           | 35.7 $\pm$ 11                        | 60 $\pm$ 40    |
| ALT (IU/L) mean $\pm$ S.D.                           | 37.9 $\pm$ 12                        | 82 $\pm$ 56    |
| Alk Phos (IU/L) mean $\pm$ S.D.                      | 96 $\pm$ 73                          | 93 $\pm$ 33    |
| Bilirubin (mg/dl) mean $\pm$ S.D.                    | 0.6 $\pm$ 0.2                        | 0.6 $\pm$ 0.6  |
| Albumin (gm/dl) mean $\pm$ S.D.                      | 4.3 $\pm$ 0.2                        | 4.4 $\pm$ 0.5  |
| Steatohepatitis (n)                                  | 0                                    | 58             |
| Steatosis grade: mean                                | -                                    | 2              |
| Lobular inflammation grade: mean                     | -                                    | 1.4            |
| Hepatocellular Ballooning: mean                      | -                                    | 1.8            |
| Fibrosis stage: mean                                 | -                                    | 1.3            |
| Distribution of Steatosis grade                      |                                      |                |
| 0                                                    | 6                                    | 2              |
| 1                                                    | -                                    | 29             |
| 2                                                    | -                                    | 27             |
| 3                                                    | -                                    | 14             |
| Distribution of Lobular inflammation grade           |                                      |                |
| 0                                                    | 6                                    | 5              |
| 1                                                    | -                                    | 55             |
| 2                                                    | -                                    | 12             |
| Distribution of Hepatocellular ballooning grade      |                                      |                |
| 0                                                    | 6                                    | 14             |
| 1                                                    | -                                    | 28             |
| 2                                                    | -                                    | 30             |
| Distribution of NAS                                  |                                      |                |
| 0                                                    | 6                                    | 0              |
| 1                                                    | -                                    | 2              |
| 2                                                    | -                                    | 9              |
| 3                                                    | -                                    | 18             |
| 4                                                    | -                                    | 17             |
| 5                                                    | -                                    | 18             |

|                                |   |    |
|--------------------------------|---|----|
| 6                              | - | 8  |
| Distribution of fibrosis stage |   |    |
| 0                              | 6 | 19 |
| 1                              | - | 28 |
| 2                              | - | 9  |
| 3                              | - | 14 |
| 4                              | - | 2  |
